# Supplementary material
Source: Elsevier journal article supplement (https://www.sciencedirect.com/science/article/pii/S1413867017306542)
Supplement: mmc1 [file S1413867017306542:mmc1.docx]

# Appendix A. Focus on the patient

#
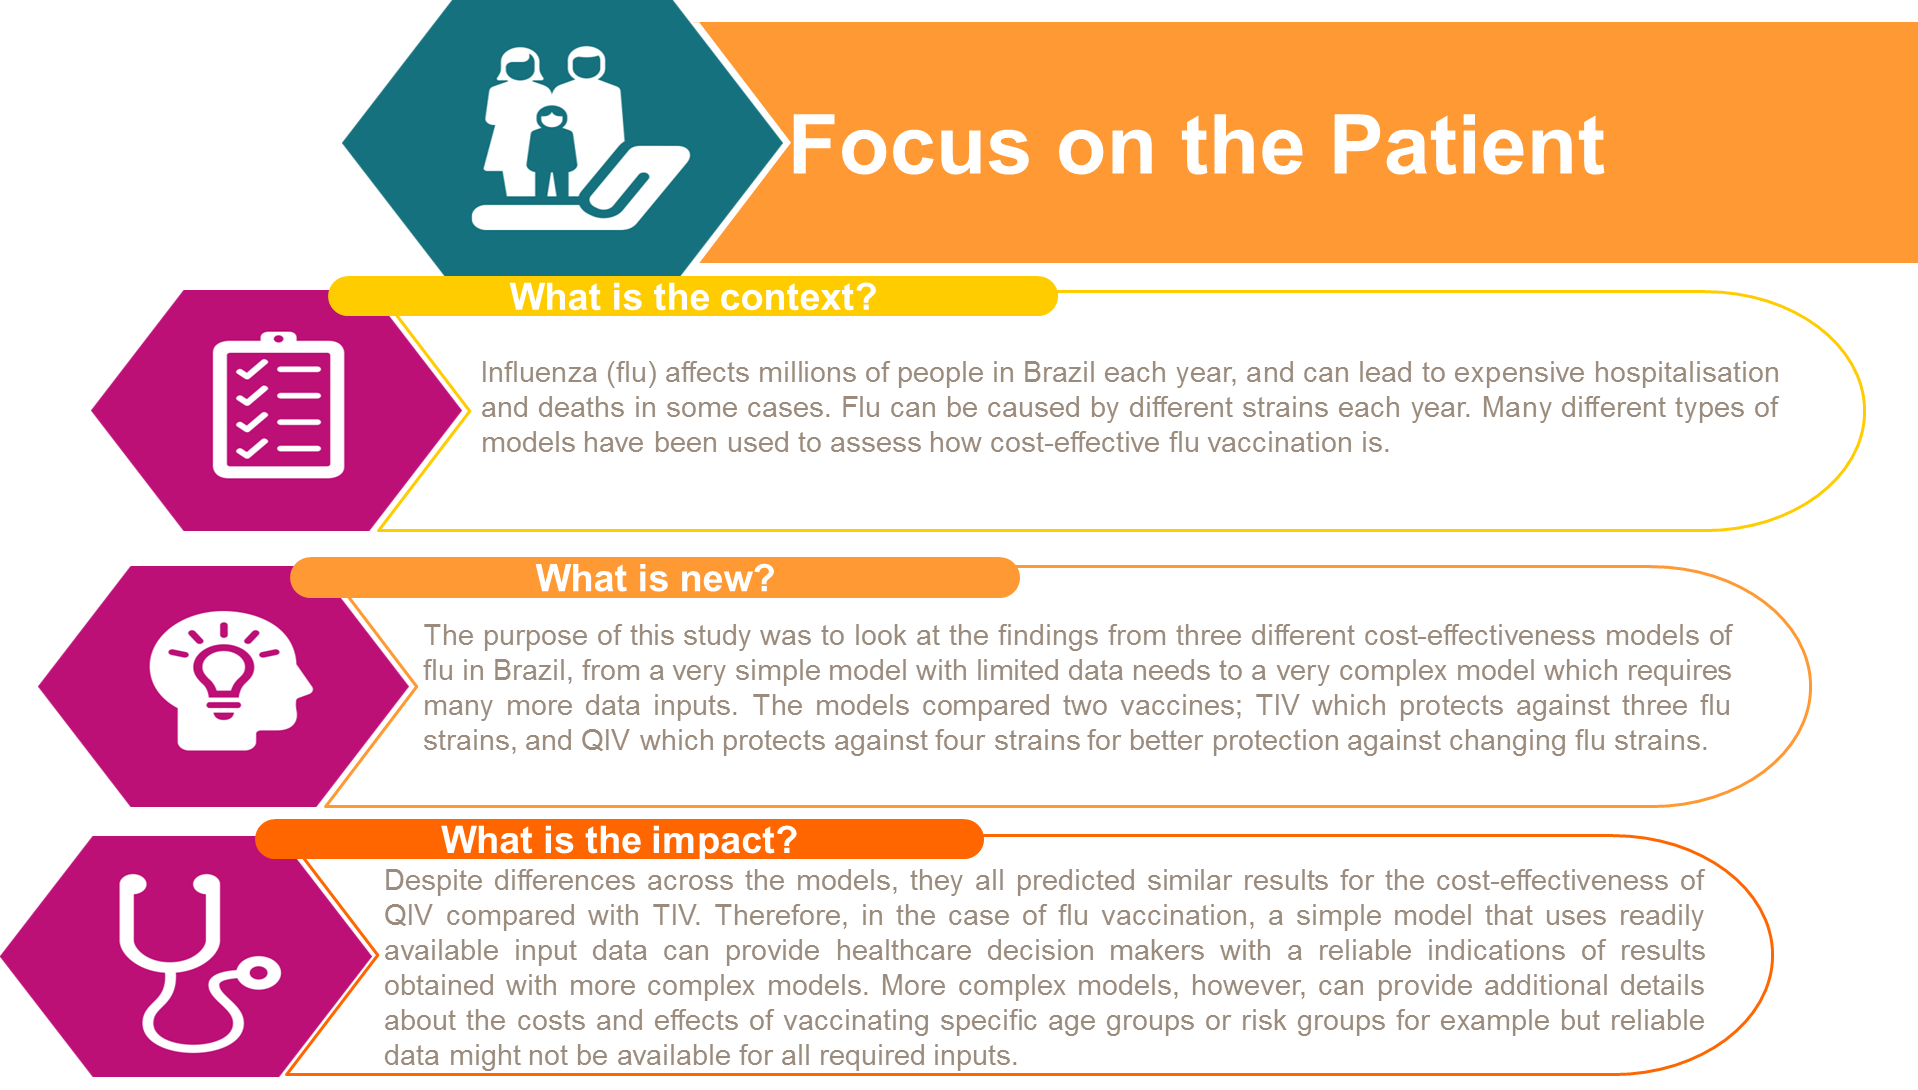


# Appendix B. FLOU and FLORA model structure

**Figure B1. FLOU model structure**


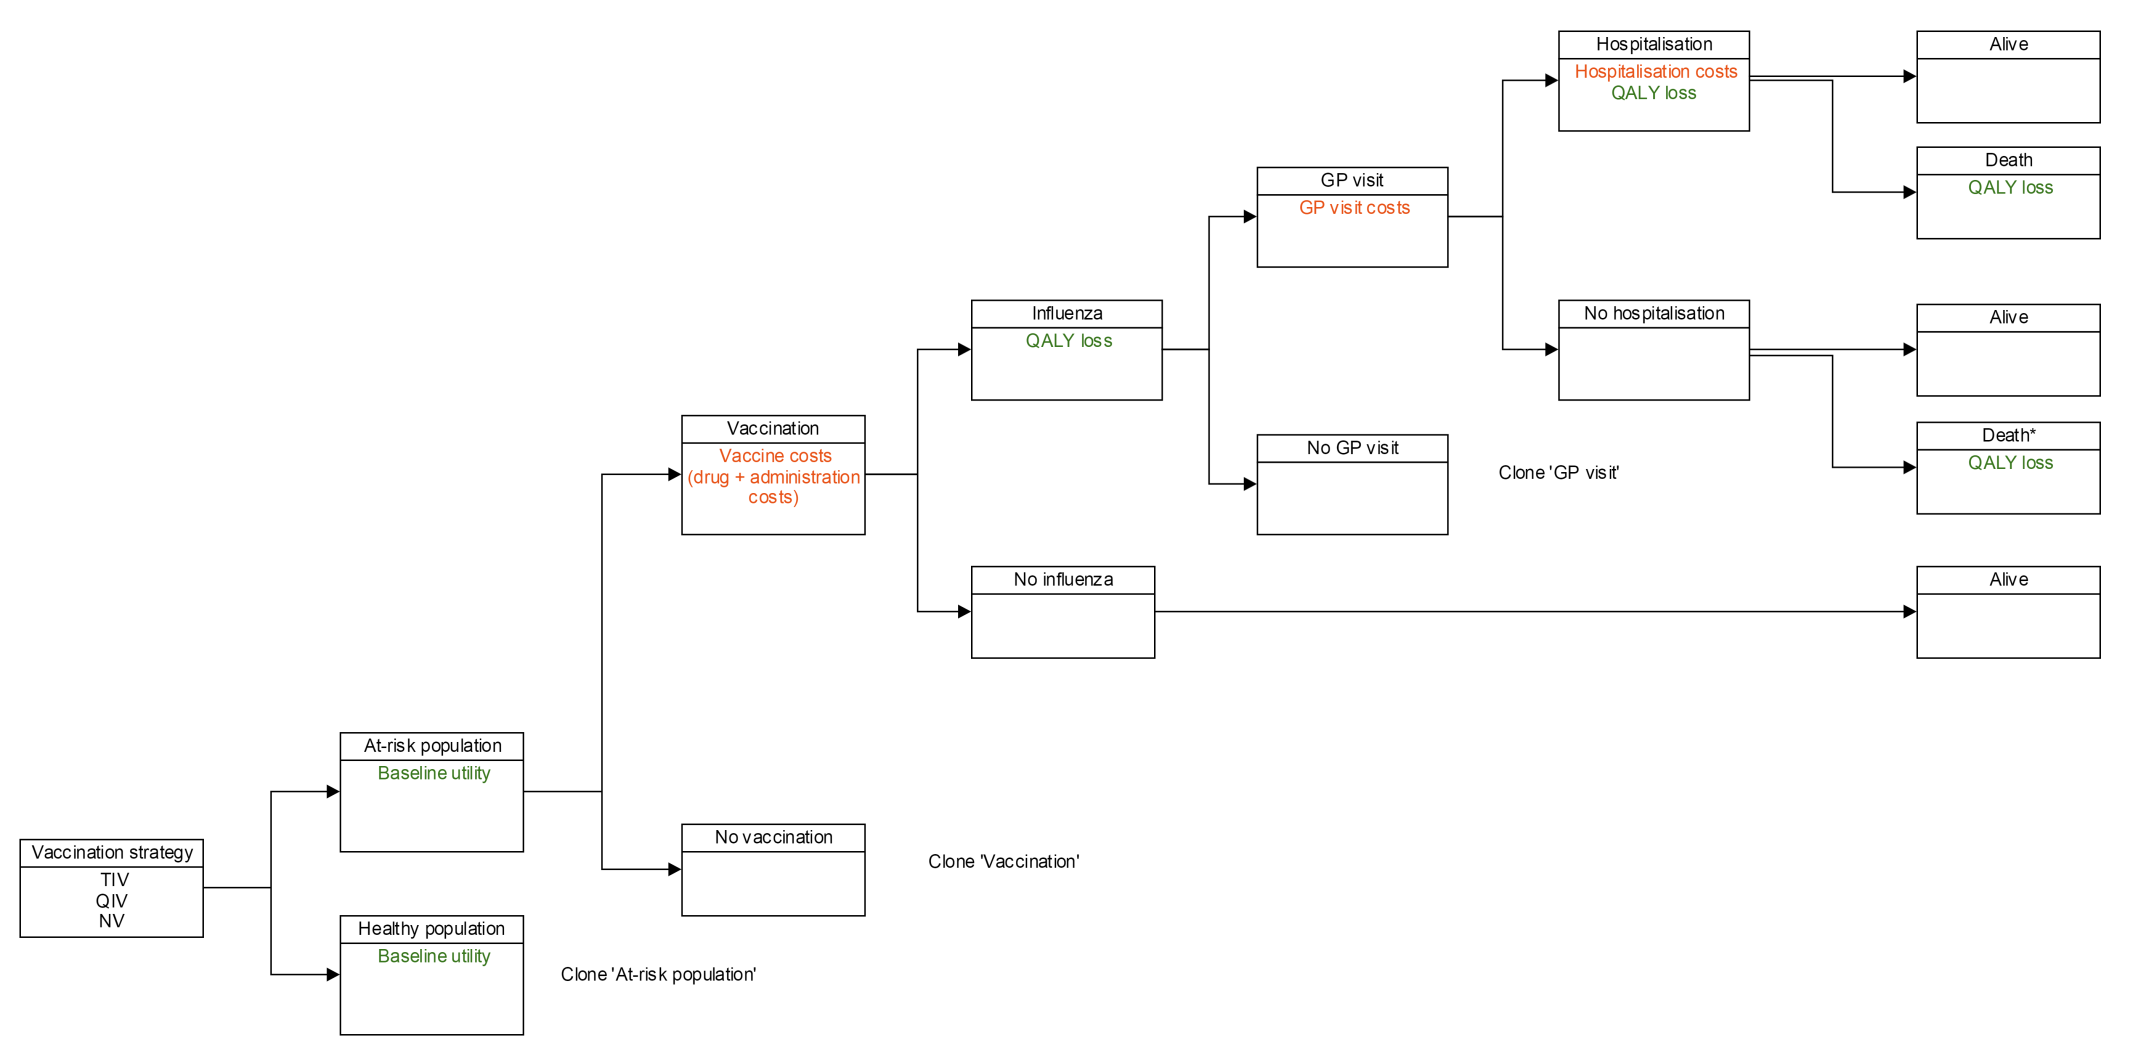
* For this analysis, it was assumed that there are no deaths following “no hospitalisation”. QIV: Quadrivalent influenza vaccine; TIV: Trivalent influenza vaccine; NV: No Vaccination; GP: General practitioner; QALY: Quality-adjusted life year

**Figure B2. FLORA model structure**


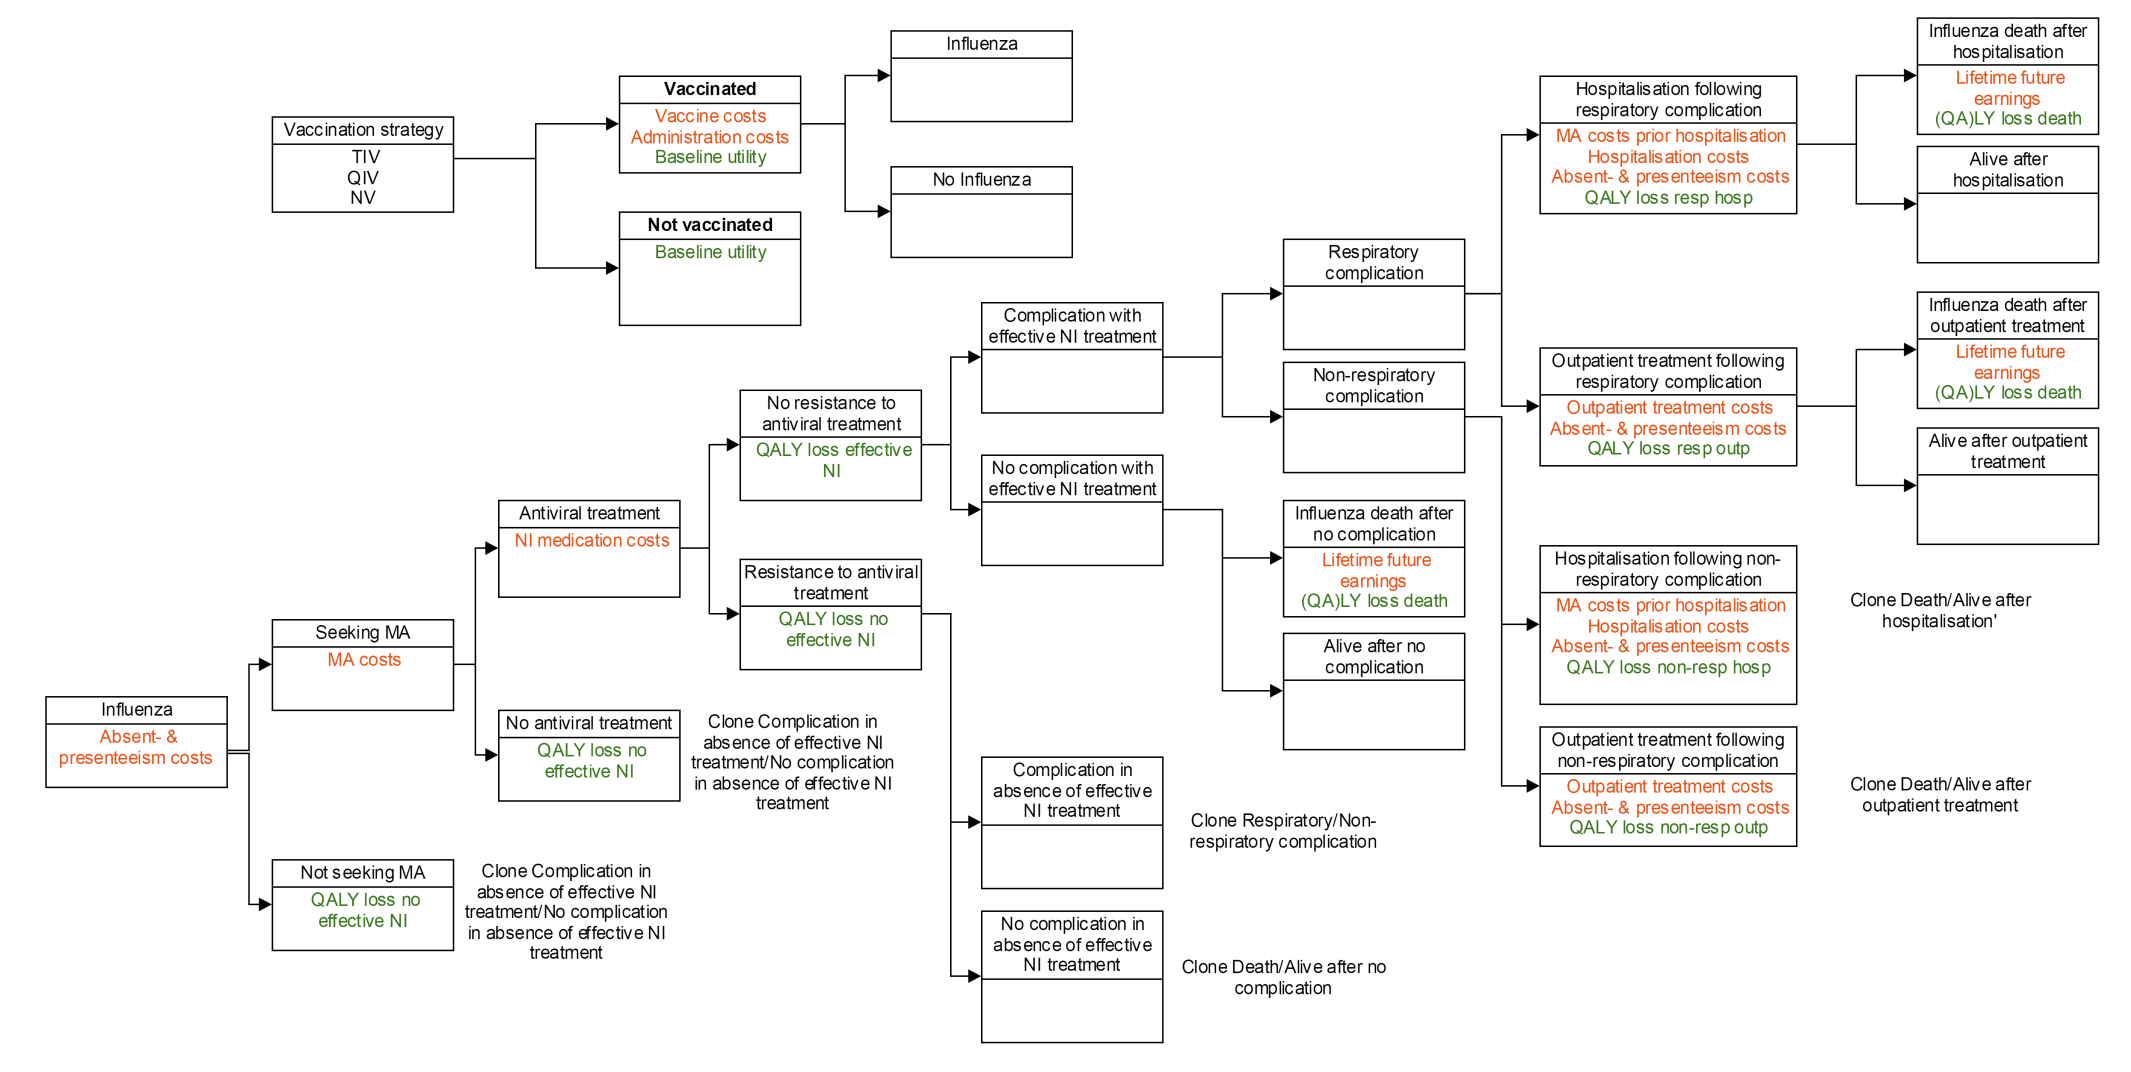
QIV: quadrivalent influenza vaccine; TIV: trivalent influenza vaccine; GP: general practitioner; MA: Medical advice; NI: neuraminidase inhibitors; QALY: quality-adjusted life year

# Appendix C. Model input tables for Analysis 1 (FLOU inputs) and Analysis 2 (Best available inputs)

Table C1. Demographic inputs

| **Population distribution (%)** | | | | | | | | | | | | | | | | | | | | |
| --- | --- | --- | --- | --- | --- | --- | --- | --- | --- | --- | --- | --- | --- | --- | --- | --- | --- | --- | --- | --- |
| FLOU | Paediatric | | | | | | | Adult | | | | | | | | | Elderly | | | |
|  | 28.74 | | | | | | | 63.62 | | | | | | | | | 7.64 | | | |
| FLORA1/FLORA2 | 0-6m | | | 7-24m | | | | | | 3-17y | | | | | 18-64y | | | | 65+y | |
|  | 0.72 | | | 3.64 | | | | | | 24.38 | | | | | 63.62 | | | | 7.64 | |
| FLORENCE1/  FLORENCE2 | <5y | 5-17y | | | 18-49y | | | 50-64y | | | 65-69y | | 70-74y | | | | 75-79y | 80-84y | | 85+y |
|  | 7.37 | 21.38 | | | 49.60 | | | 14.02 | | | 2.75 | | 1.94 | | | | 1.39 | 0.85 | | 0.71 |
| **Clinically at risk (%)** | | | | | | | | | | | | | | | | | | | | |
| FLOU° | Paediatric | | | | | | Adult | | | | | | | | | Elderly | | | | |
|  | 5.08 | | | | | | 6.61 | | | | | | | | | 46.63 | | | | |
| FLORA2 | 0-6m | | | 7-24m | | | | | | 3-17y | | | | | 18-64y | | | | 65+y | |
|  | 5.40 | | | 5.40 | | | | | | 5.02 | | | | | 6.61 | | | | 46.63 | |
| FLORENCE2 | <5y | 5-17y | | | 18-49y | | | 50-64y | | | 65-69y | | 70-74y | | | | 75-79y | 80-84y | | 85+y |
|  | 5.40 | 4.96 | | | 3.57 | | | 17.35 | | | 45.20 | | 45.20 | | | | 48.90 | 48.90 | | 48.90 |
| **Probability of influenza (%)** | | | | | | | | | | | | | | | | | | | | |
| FLOU° | Paediatric | | | | | | Adult | | | | | | | | | Elderly | | | | |
| Both | 12.79 | | | | | | 7.05 | | | | | | | | | 9.00 | | | | |
| FLORA2 | 0-6m | | | 7-24m | | | | | | 3-17y | | | | | 18-64y | | | | 65+y | |
| Healthy | 20.30 | | | 20.30 | | | | | | 11.44 | | | | | 7.05 | | | | 9.00 | |
| At-risk | 20.30 | | | 20.30 | | | | | | 11.54 | | | | | 7.05 | | | | 9.00 | |
| FLORENCE2 | <5y | 5-17y | | | 18-49y | | | 50-64y | | | 65-69y | | 70-74y | | | | 75-79y | 80-84y | | 85+y |
| Both | 20.30 | 10.20 | | | 7.05 | | | 7.05 | | | 9.00 | | 9.00 | | | | 9.00 | 9.00 | | 9.00 |
| **Probability of death in hospitalised cases (%) *** | | | | | | | | | | | | | | | | | | | | |
| FLOU° | Paediatric | | | | | | | | Adult | | | | | | | | Elderly | | | |
| Both | 0.83 | | | | | | | | 4.34 | | | | | | | | 27.79 | | | |
| FLORA2 | 0-6m | | | 7-24m | | | | | | 3-17y | | | | | 18-64y | | | | 65+y | |
| Healthy | 0.28 | | | 0.28 | | | | | | 1.14 | | | | | 3.77 | | | | 27.79 | |
| At-risk | 0.28 | | | 0.28 | | | | | | 1.11 | | | | | 5.72 | | | | 27.79 | |
| FLORENCE2 | <5y | | 5-17y | | | 18-49y | | | 50-64y | | | 65-69y | | 70-74y | | | 75-79y | 80-84y | | 85+y |
| Both | 0.28 | | 1.67 | | | 2.14 | | | 6.94 | | | 27.79 | | 27.79 | | | 27.79 | 27.79 | | 27.79 |

FLORA1, FLORENCE1 = Analysis 1; FLORA2, FLORENCE2 = Analysis 2; FLOU inputs are used for analysis 1 and analysis 2; ° Inputs used as well for FLORA1 and FLORENCE1; * The models included the probability of influenza-related death after uncomplicated disease or outpatient treatment of complications, however, this was 0% for Brazil so not reported in this table. m: months old; y: years old.

Table C2. Probability of (respiratory) complications

| **Probability of complications (%)** | | | | | | | | | | | | | | | | | | | | | | | | | | | | |
| --- | --- | --- | --- | --- | --- | --- | --- | --- | --- | --- | --- | --- | --- | --- | --- | --- | --- | --- | --- | --- | --- | --- | --- | --- | --- | --- | --- | --- |
| FLORA1 | Paediatric | | | | | | | | Adult | | | | | | | | | | | Elderly | | | | | | | | |
| Healthy | 0.56 | | | | | | | | 0.75 | | | | | | | | | | | 3.51 | | | | | | | | |
| At-risk1 | 2.44 | | | | | | | | 4.41 | | | | | | | | | | | 15.16 | | | | | | | | |
| At-risk2 | NA | | | | | | | | NA | | | | | | | | | | | NA | | | | | | | | |
| FLORENCE1 | Paediatric | | | | | | | | Adult | | | | | | | | | | | Elderly | | | | | | | | |
| Healthy | 0.56 | | | | | | | | 0.77 | | | | | | | | | | | 3.51 | | | | | | | | |
| At-risk1 | 2.40 | | | | | | | | 3.34 | | | | | | | | | | | 15.16 | | | | | | | | |
| At-risk2 | NA | | | | | | | | NA | | | | | | | | | | | NA | | | | | | | | |
| FLORA2 | 0-6m | | | | 7-24m | | | | | | | 3-17y | | | | | | 18-64y | | | | | | | 65+y | | | |
| Healthy | 13.99 | | | | 13.99 | | | | | | | 6.86 | | | | | | 13.65 | | | | | | | 17.58 | | | |
| At-risk1 | 19.92 | | | | 19.92 | | | | | | | 9.89 | | | | | | 20.81 | | | | | | | 25.02 | | | |
| At-risk2 | 13.92 | | | | 13.92 | | | | | | | 6.67 | | | | | | 9.51 | | | | | | | 11.78 | | | |
| FLORENCE2 | <5y | | 5-17y | | | | 18-49y | | | 50-64y | | | | 65-69y | | 70-74y | | | | | 75-79y | | 80-84y | | | | 85+y | |
| Healthy | 13.99 | | 4.88 | | | | 13.15 | | | 15.68 | | | | 17.58 | | 17.58 | | | | | 17.58 | | 17.58 | | | | 17.58 | |
| At-risk1 | 19.92 | | 6.94 | | | | 18.72 | | | 22.32 | | | | 25.02 | | 25.02 | | | | | 25.02 | | 25.02 | | | | 25.02 | |
| At-risk2 | 13.92 | | 4.62 | | | | 8.44 | | | 10.31 | | | | 11.77 | | 11.77 | | | | | 11.77 | | 11.77 | | | | 11.77 | |
| **Probability that a complication is a respiratory complication (%)** | | | | | | | | | | | | | | | | | | | | | | | | | | | | |
| FLOU° | Paediatric | | | | | | | | | Adult | | | | | | | | | | | Elderly | | | | | | | |
| Healthy | 100.00 | | | | | | | | | 100.00 | | | | | | | | | | | 100.00 | | | | | | | |
| At-risk | 100.00 | | | | | | | | | 100.00 | | | | | | | | | | | 100.00 | | | | | | | |
| FLORA2 | 0-6m | | | | 7-24m | | | | | | | 3-17y | | | | | | 18-64y | | | | | | | 65+y | | | |
| Healthy | 15.13 | | | | 15.13 | | | | | | | 19.23 | | | | | | 53.12 | | | | | | | 42.50 | | | |
| At-risk | 21.53 | | | | 21.53 | | | | | | | 27.16 | | | | | | 72.71 | | | | | | | 60.50 | | | |
| FLORENCE2 | <5y | | 5-17y | | | | 18-49y | | | 50-64y | | | | 65-69y | | 70-74y | | | | | 75-79y | | 80-84y | | | | 85+y | |
| Healthy | 15.13 | | 22.51 | | | | 54.26 | | | 49.15 | | | | 42.50 | | 42.50 | | | | | 42.50 | | 42.50 | | | | 42.50 | |
| At-risk | 21.53 | | 32.04 | | | | 77.24 | | | 69.95 | | | | 60.50 | | 60.50 | | | | | 60.50 | | 60.50 | | | | 60.50 | |
| **Probability that a respiratory complication is pneumonia (%)** | | | | | | | | | | | | | | | | | | | | | | | | | | | | |
| FLORA2 | | 0-6m | | | | 7-24m | | | | | | | 3-17y | | | | | | 18-64y | | | | | | | 65+y | | |
| Healthy | | 100.00 | | | | 100.00 | | | | | | | 100.00 | | | | | | 7.93 | | | | | | | 20.60 | | |
| At-risk | | 100.00 | | | | 100.00 | | | | | | | 100.00 | | | | | | 14.72 | | | | | | | 29.32 | | |
| FLORENCE2 | | <5y | | 5-17y | | | | 18-49y | | | 50-64y | | | | 65-69y | | 70-74y | | | | | 75-79y | | 80-84y | | | | 85+y |
| Healthy | | 100.00 | | 100.00 | | | | 6.65 | | | 12.82 | | | | 20.60 | | 20.60 | | | | | 20.60 | | 20.60 | | | | 20.60 |
| At-risk | | 100.00 | | 100.00 | | | | 9.47 | | | 18.25 | | | | 29.32 | | 29.32 | | | | | 29.32 | | 29.32 | | | | 29.32 |
| **Probability that a respiratory complication is a URTI (%)** | | | | | | | | | | | | | | | | | | | | | | | | | | | | |
| FLORA2 | | 0-6m | | | | 7-24m | | | | | | | 3-17y | | | | | | 18-64y | | | | | | | 65+y | | |
| Healthy | | 0.00 | | | | 0.00 | | | | | | | 0.00 | | | | | | 92.07 | | | | | | | 79.40 | | |
| At-risk | | 0.00 | | | | 0.00 | | | | | | | 0.00 | | | | | | 85.28 | | | | | | | 70.68 | | |
| FLORENCE2 | | <5y | | 5-17y | | | | 18-49y | | | 50-64y | | | | 65-69y | | 70-74y | | | | | 75-79y | | 80-84y | | | | 85+y |
| Healthy | | 0.00 | | 0.00 | | | | 93.35 | | | 87.18 | | | | 79.40 | | 79.40 | | | | | 79.40 | | 79.40 | | | | 79.40 |
| At-risk | | 0.00 | | 0.00 | | | | 90.53 | | | 81.75 | | | | 70.68 | | 70.68 | | | | | 70.68 | | 70.68 | | | | 70.68 |

FLORA1/FLORENCE1 = Analysis 1: FLORA2/FLORENCE2 = Analysis 2; probability of hospitalisation data used for comparison to FLOU

1 At-risk, with no effective NI treatment, 2 At-risk, with effective NI treatment

° Inputs used for FLORA and FLORENCE Analysis 1

URTI, Upper Respiratory Tract Infection; m: months old; y: years old.

Table C3. FLORA and FLORENCE probability that a non-respiratory complication is cardiac, renal, CNS, OM or other complication (Analysis 2 only)

| **Probability that a non-respiratory complication is cardiac (%)** | | | | | | | | | | | | | |
| --- | --- | --- | --- | --- | --- | --- | --- | --- | --- | --- | --- | --- | --- |
| FLORA2 | 0-6m | | 7-24m | | | 3-17y | | | 18-64y | | | 65+y | |
| Healthy | 0.00 | | 0.00 | | | 0.00 | | | 4.22 | | | 22.38 | |
| At-risk | 0.00 | | 0.00 | | | 0.00 | | | 10.22 | | | 31.86 | |
| FLORENCE2 | <5y | 5-17y | | 18-49y | 50-64y | | 65-69y | 70-74y | | 75-79y | 80-84y | | 85+y |
| Healthy | 0.00 | 0.00 | | 2.59 | 9.30 | | 22.38 | 22.38 | | 22.38 | 22.38 | | 22.38 |
| At-risk | 0.00 | 0.00 | | 3.68 | 13.24 | | 31.86 | 31.86 | | 31.86 | 31.86 | | 31.86 |
| **Probability that a non-respiratory complication is renal (%)** | | | | | | | | | | | | | |
| FLORA2 | 0-6m | | 7-24m | | | 3-17y | | | 18-64y | | | 65+y | |
| Healthy | 0.00 | | 0.00 | | | 0.00 | | | 1.22 | | | 3.21 | |
| At-risk | 0.00 | | 0.00 | | | 0.00 | | | 1.85 | | | 4.56 | |
| FLORENCE2 | <5y | 5-17y | | 18-49y | 50-64y | | 65-69y | 70-74y | | 75-79y | 80-84y | | 85+y |
| Healthy | 0.00 | 0.00 | | 1.17 | 1.36 | | 3.21 | 3.21 | | 3.21 | 3.21 | | 3.21 |
| At-risk | 0.00 | 0.00 | | 1.67 | 1.93 | | 4.56 | 4.56 | | 4.56 | 4.56 | | 4.56 |
| **Probability that a non-respiratory complication is CNS (%)** | | | | | | | | | | | | | |
| FLORA2 | 0-6m | | 7-24m | | | 3-17y | | | 18-64y | | | 65+y | |
| Healthy | 0.00 | | 0.00 | | | 0.00 | | | 10.72 | | | 7.83 | |
| At-risk | 0.00 | | 0.00 | | | 0.00 | | | 14.27 | | | 11.14 | |
| FLORENCE2 | <5y | 5-17y | | 18-49y | 50-64y | | 65-69y | 70-74y | | 75-79y | 80-84y | | 85+y |
| Healthy | 0.00 | 0.00 | | 11.10 | 9.53 | | 7.83 | 7.83 | | 7.83 | 7.83 | | 7.83 |
| At-risk | 0.00 | 0.00 | | 15.80 | 13.56 | | 11.14 | 11.14 | | 11.14 | 11.14 | | 11.14 |
| **Probability that a non-respiratory complication is OM (%)** | | | | | | | | | | | | | |
| FLORA2 | 0-6m | | 7-24m | | | 3-17y | | | 18-64y | | | 65+y | |
| Healthy | 100.00 | | 100.00 | | | 100.00 | | | 12.10 | | | 4.01 | |
| At-risk | 100.00 | | 100.00 | | | 100.00 | | | 14.27 | | | 5.70 | |
| FLORENCE2 | <5y | 5-17y | | 18-49y | 50-64y | | 65-69y | 70-74y | | 75-79y | 80-84y | | 85+y |
| Healthy | 100.00 | 100.00 | | 13.24 | 8.54 | | 4.01 | 4.01 | | 4.01 | 4.01 | | 4.01 |
| At-risk | 100.00 | 100.00 | | 18.85 | 12.15 | | 5.70 | 5.70 | | 5.70 | 5.70 | | 5.70 |
| **Probability that a non-respiratory complication is other (%)** | | | | | | | | | | | | | |
| FLORA2 | 0-6m | | 7-24m | | | 3-17y | | | 18-64y | | | 65+y | |
| Healthy | 0.00 | | 0.00 | | | 0.00 | | | 71.75 | | | 62.58 | |
| At-risk | 0.00 | | 0.00 | | | 0.00 | | | 59.39 | | | 46.73 | |
| FLORENCE2 | <5y | 5-17y | | 18-49y | 50-64y | | 65-69y | 70-74y | | 75-79y | 80-84y | | 85+y |
| Healthy | 0.00 | 0.00 | | 71.90 | 71.27 | | 62.58 | 62.58 | | 62.58 | 62.58 | | 62.58 |
| At-risk | 0.00 | 0.00 | | 60.00 | 59.11 | | 46.73 | 46.73 | | 46.73 | 46.73 | | 46.73 |

FLORA2/FLORENCE2 = Analysis 2; CNS, Cerebral Nervous System; OM, Otitis Media; m: months old; y: years old.

Table C4.Resource use inputs

| **Probability of seeking MA (GP visit) (%)** | | | | | | | | | | | | | | | | | | | | | | | | | | | | | | | | | | | | | | | | | | | | |
| --- | --- | --- | --- | --- | --- | --- | --- | --- | --- | --- | --- | --- | --- | --- | --- | --- | --- | --- | --- | --- | --- | --- | --- | --- | --- | --- | --- | --- | --- | --- | --- | --- | --- | --- | --- | --- | --- | --- | --- | --- | --- | --- | --- | --- |
| FLOU° | Paediatric | | | | | | | | | | | | | Adult | | | | | | | | | | | | | | | | | | Elderly | | | | | | | | | | | | |
| Healthy | 37.36 | | | | | | | | | | | | | 31.30 | | | | | | | | | | | | | | | | | | 62.00 | | | | | | | | | | | | |
| At-risk | 75.25 | | | | | | | | | | | | | 62.50 | | | | | | | | | | | | | | | | | | 82.00 | | | | | | | | | | | | |
| FLORA2 | 0-6m | | | | 7-24m | | | | | | | | | | | | | 3-17y | | | | | | | | | 18-64y | | | | | | | | | | | 65+y | | | | | | |
| Healthy | 45.50 | | | | 45.50 | | | | | | | | | | | | | 34.78 | | | | | | | | | 31.30 | | | | | | | | | | | 62.00 | | | | | | |
| At-risk | 91.00 | | | | 91.00 | | | | | | | | | | | | | 69.92 | | | | | | | | | 62.50 | | | | | | | | | | | 82.00 | | | | | | |
| FLORENCE2 | <5y | | 5-17y | | | | | | | | 18-49y | | | 50-64y | | | | | | | 65-69y | | | 70-74y | | | | | | | | 75-79y | | | | 80-84y | | | | | | | 85+y | |
| Healthy | 45.50 | | 31.80 | | | | | | | | 31.30 | | | 31.30 | | | | | | | 62.00 | | | 62.00 | | | | | | | | 62.00 | | | | 62.00 | | | | | | | 62.00 | |
| At-risk | 91.00 | | 63.50 | | | | | | | | 62.50 | | | 62.50 | | | | | | | 82.00 | | | 82.00 | | | | | | | | 82.00 | | | | 82.00 | | | | | | | 82.00 | |
| **Probability of NI treatment (%)** | | | | | | | | | | | | | | | | | | | | | | | | | | | | | | | | | | | | | | | | | | | | |
| FLORA2 | 0-6m | | | | | | 7-24m | | | | | | | | | | 3-17y | | | | | | | | | | | 18-64y | | | | | | | | | | | 65+y | | | | | |
| At-risk | 11.31 (all ages) | | | | | | | | | | | | | | | | | | | | | | | | | | | | | | | | | | | | | | | | | | | |
| FLORENCE2 | <5y | | 5-17y | | | | | | | | 18-49y | | | 50-64y | | | | | | | 65-69y | | | 70-74y | | | | | | | | 75-79y | | | | 80-84y | | | | | | | 85+y | |
| At-risk | 11.31 (all ages) | | | | | | | | | | | | | | | | | | | | | | | | | | | | | | | | | | | | | | | | | | | |
| **Resistance to NI treatment (%)** | | | | | | | | | | | | | | | | | | | | | | | | | | | | | | | | | | | | | | | | | | | | |
| FLORA2 | 0-6m | | | | | 7-24m | | | | | | | | | | 3-17y | | | | | | | | | | 18-64y | | | | | | | | | 65+y | | | | | | | | | |
| At-risk | 5.03 | | | | | 5.03 | | | | | | | | | | 5.03 | | | | | | | | | | 1.77 | | | | | | | | | 1.77 | | | | | | | | | |
| FLORENCE2 | <5y | | 5-17y | | | | | | | 18-49y | | | 50-64y | | | | | | | 65-69y | | | 70-74y | | | | | | | | 75-79y | | | 80-84y | | | | | | | | 85+y | | |
| At-risk | 5.03 | | 5.03 | | | | | | | 1.77 | | | 1.77 | | | | | | | 1.77 | | | 1.77 | | | | | | | | 1.77 | | | 1.77 | | | | | | | | 1.77 | | |
| **Probability of hospitalisation given influenza (%)** | | | | | | | | | | | | | | | | | | | | | | | | | | | | | | | | | | | | | | | | | | | | |
| FLOU | Paediatric | | | | | | | | | | | | | Adult | | | | | | | | | | | | | | | | | | Elderly | | | | | | | | | | | | |
| Healthy | 0.56 | | | | | | | | | | | | | 0.75 | | | | | | | | | | | | | | | | | | 3.51 | | | | | | | | | | | | |
| At-risk | 2.44 | | | | | | | | | | | | | 4.41 | | | | | | | | | | | | | | | | | | 15.16 | | | | | | | | | | | | |
| **Probability of hospitalisation following respiratory complication (%)** | | | | | | | | | | | | | | | | | | | | | | | | | | | | | | | | | | | | | | | | | | | | |
| FLORA2 | | 0-6m | | | | | | | 7-24m | | | | | | | | | | 3-17y | | | | | | | | | | | 18-64y | | | | | | | | | | | 65+y | | | |
| Healthy | | 5.88 | | | | | | | 5.88 | | | | | | | | | | 7.24 | | | | | | | | | | | 5.46 | | | | | | | | | | | 19.95 | | | |
| At-risk | | 17.87 | | | | | | | 17.87 | | | | | | | | | | 21.87 | | | | | | | | | | | 20.93 | | | | | | | | | | | 60.58 | | | |
| FLORENCE2 | | <5y | | 5-17y | | | | | | | | 18-49y | | | 50-64y | | | | | | | 65-69y | | | 70-74y | | | | | | | | 75-79y | | | | 80-84y | | | | | | | 85+y |
| Healthy | | 5.88 | | 7.97 | | | | | | | | 4.71 | | | 8.36 | | | | | | | 19.95 | | | 19.95 | | | | | | | | 19.95 | | | | 19.95 | | | | | | | 19.95 |
| At-risk | | 17.87 | | 24.20 | | | | | | | | 14.30 | | | 25.40 | | | | | | | 60.58 | | | 60.58 | | | | | | | | 60.58 | | | | 60.58 | | | | | | | 60.58 |
| **Probability of hospitalisation following non-respiratory complication (%)** | | | | | | | | | | | | | | | | | | | | | | | | | | | | | | | | | | | | | | | | | | | | |
| FLORA2 | 0-6m | | | | | | | 7-24m | | | | | | | | | 3-17y | | | | | | | | | | | | 18-64y | | | | | | | | | | | 65+y | | | | |
| Healthy | 5.88 | | | | | | | 5.88 | | | | | | | | | 6.77 | | | | | | | | | | | | 5.59 | | | | | | | | | | | 19.95 | | | | |
| At-risk | 17.87 | | | | | | | 17.87 | | | | | | | | | 20.29 | | | | | | | | | | | | 21.86 | | | | | | | | | | | 60.58 | | | | |
| FLORENCE2 | <5y | | 5-17y | | | | | | | | 18-49y | | | 50-64y | | | | | | | 65-69y | | | 70-74y | | | | | | | | 75-79y | | | | 80-84y | | | | | | | 85+y | |
| Healthy | 5.88 | | 7.54 | | | | | | | | 4.71 | | | 8.36 | | | | | | | 19.95 | | | 19.95 | | | | | | | | 19.95 | | | | 19.95 | | | | | | | 19.95 | |
| At-risk | 17.87 | | 22.71 | | | | | | | | 14.30 | | | 25.40 | | | | | | | 60.58 | | | 60.58 | | | | | | | | 60.58 | | | | 60.58 | | | | | | | 60.58 | |

FLORA2, FLORENCE2 = Analysis 2; FLOU inputs are used for analysis 1 and analysis 2; ° Inputs used as well for FLORA1 and FLORENCE1; GP: general practitioner; MA: Medical advice; NI: neuraminidase inhibitors; m: months old; y: years old.

Table C5. Vaccine inputs

| **TIV & QIV efficacy against influenza A (%)** | | | | | | | | | | | | | | | | | | | | | | | | | | | |
| --- | --- | --- | --- | --- | --- | --- | --- | --- | --- | --- | --- | --- | --- | --- | --- | --- | --- | --- | --- | --- | --- | --- | --- | --- | --- | --- | --- |
| FLOU° | Paediatric | | | | | | Adult | | | | | | | | | | | | Elderly | | | | | | | | |
|  | 59.00 | | | | | | 61.00 | | | | | | | | | | | | 58.00 | | | | | | | | |
| FLORA2 | 0-6m | | | 7-24m | | | | | | 3-17y | | | | | | | 18-64y | | | | | | | 65+y | | | |
|  | 59.00 | | | 59.00 | | | | | | 59.00 | | | | | | | 61.00 | | | | | | | 58.00 | | | |
| FLORENCE2 | <5y | 5-17y | | | 18-49y | | 50-64y | | | | | 65-69y | | 70-74y | | | | | 75-79y | | 80-84y | | | | | 85+y | |
|  | 59.00 | 59.00 | | | 61.00 | | 61.00 | | | | | 58.00 | | 58.00 | | | | | 58.00 | | 58.00 | | | | | 58.00 | |
| **TIV efficacy against influenza B with match  (=QIV efficacy against influenza B – average season) (%)** | | | | | | | | | | | | | | | | | | | | | | | | | | | |
| FLOU° | Paediatric | | | | | | Adult | | | | | | | | | | | | Elderly | | | | | | | | |
|  | 74.18 | | | | | | 76.12 | | | | | | | | | | | | 67.84 | | | | | | | | |
| FLORA2 | 0-6m | | 7-24m | | | | | | 3-17y | | | | | | | 18-64y | | | | | | | 65+y | | | | |
|  | 66.00 | | 66.00 | | | | | | 75.64 | | | | | | | 76.12 | | | | | | | 67.84 | | | | |
| FLORENCE2 | <5y | 5-17y | | | 18-49y | | 50-64y | | | | | 65-69y | | 70-74y | | | | | 75-79y | | 80-84y | | | | | 85+y | |
|  | 66.00 | 77.00 | | | 77.00 | | 73.00 | | | | | 69.00 | | 69.00 | | | | | 66.00 | | 66.00 | | | | | 66.00 | |
| **TIV efficacy against influenza B with mismatch (%)** | | | | | | | | | | | | | | | | | | | | | | | | | | | |
| FLOU° | Paediatric | | | | | | Adult | | | | | | | | | | | | Elderly | | | | | | | | |
|  | 49.95 | | | | | | 51.34 | | | | | | | | | | | | 45.84 | | | | | | | | |
| FLORA2 | 0-6m | | 7-24m | | | | | | 3-17y | | | | | | | 18-64y | | | | | | | 65+y | | | | |
|  | 44.00 | | 44.00 | | | | | | 51.01 | | | | | | | 51.34 | | | | | | | 45.84 | | | | |
| FLORENCE2 | <5y | 5-17y | | | 18-49y | | 50-64y | | | | | 65-69y | | 70-74y | | | | | 75-79y | | 80-84y | | | | | 85+y | |
|  | 44.00 | 52.00 | | | 52.00 | | 49.00 | | | | | 47.00 | | 47.00 | | | | | 44.00 | | 44.00 | | | | | 44.00 | |
| **TIV efficacy against influenza B – average season (%)** | | | | | | | | | | | | | | | | | | | | | | | | | | | |
| FLOU° | Paediatric | | | | | | Adult | | | | | | | | | | | | Elderly | | | | | | | | |
|  | 64.40 | | | | | | 66.11 | | | | | | | | | | | | 58.96 | | | | | | | | |
| FLORA2 | 0-6m | | 7-24m | | | | | | 3-17y | | | | | | | 18-64y | | | | | | | 65+y | | | | |
|  | 57.12 | | 57.12 | | | | | | 65.70 | | | | | | | 66.11 | | | | | | | 58.96 | | | | |
| FLORENCE2 | <5y | 5-17y | | | 18-49y | | 50-64y | | | | | 65-69y | | 70-74y | | | | | 75-79y | | 80-84y | | | | | 85+y | |
|  | 57.12 | 66.91 | | | 66.91 | | 63.31 | | | | | 60.12 | | 60.12 | | | | | 57.12 | | 57.12 | | | | | 57.12 | |
| **Coverage (%)** | | | | | | | | | | | | | | | | | | | | | | | | | | |
| FLOU° | Paediatric | | | | | Adult | | | | | | | | | | | | Elderly | | | | | | | | |
| Healthy | 18.48 | | | | | 8.76 | | | | | | | | | | | | 80.50 | | | | | | | | |
| At-risk | 81.30 | | | | | 84.02 | | | | | | | | | | | | 80.50 | | | | | | | | |
| FLORA2 | 0-6m | | 7-24m | | | | | 3-17y | | | | | | | 18-64y | | | | | | | 65+y | | | | |
| Healthy | 0.00 | | 73.61 | | | | | 10.82 | | | | | | | 8.76 | | | | | | | 80.50 | | | | |
| At-risk | 0.00 | | 73.61 | | | | | 85.12 | | | | | | | 84.02 | | | | | | | 80.50 | | | | |
| FLORENCE2 | <5y | 5-17y | | | 18-49y | 50-64y | | | | | 65-69y | | 70-74y | | | | | 75-79y | | 80-84y | | | | | 85+y | |
| Healthy | 62.14 | 3.50 | | | 6.26 | 19.10 | | | | | 77.15 | | 86.07 | | | | | 86.23 | | 74.41 | | | | | 74.41 | |
| At-risk | 62.14 | 88.48 | | | 88.48 | 80.77 | | | | | 77.15 | | 86.07 | | | | | 86.23 | | 74.41 | | | | | 74.41 | |

FLORA2, FLORENCE2 = Analysis 2; FLOU inputs are used for analysis 1 and analysis 2; ° Inputs used as well for FLORA1 and FLORENCE1; QIV: quadrivalent influenza vaccine; TIV: trivalent influenza vaccine; m: months old; y: years old.

Table C6. Cost inputs for Analyses 1 and 2

| **Outpatient complications cost (R$)** | | | | | | | | | | | | | |
| --- | --- | --- | --- | --- | --- | --- | --- | --- | --- | --- | --- | --- | --- |
| FLOU° | Paediatric | | | | Adult | | | | | Elderly | | | |
|  | NA | | | | NA | | | | | NA | | | |
| FLORA2 | 0-6m | | 7-24m | | | 3-17y | | | 18-64y | | | 65+y | |
|  | 31.64 | | 31.64 | | | 40.12 | | | 73.31 | | | 73.31 | |
| FLORENCE2 | <5y | 5-17y | | 18-49y | 50-64y | | 65-69y | 70-74y | | 75-79y | 80-84y | | 85+y |
|  | 31.64 | 47.08 | | 73.31 | 73.31 | | 73.31 | 73.31 | | 73.31 | 73.31 | | 73.31 |
| **Hospitalisation cost (R$)** | | | | | | | | | | | | | |
| FLOU° | Paediatric | | | | Adult | | | | | Elderly | | | |
|  | 670.90 | | | | 959.75 | | | | | 1,179.93 | | | |
| FLORA2 | 0-6m | | 7-24m | | | 3-17y | | | 18-64y | | | 65+y | |
| **Following a respiratory complication** | | | | | | | | | | | | | |
| Healthy | 981.66 | | 981.66 | | | 981.66 | | | 492.66 | | | 556.80 | |
| At risk | 981.66 | | 981.66 | | | 981.66 | | | 531.34 | | | 603.46 | |
| **Following a non-respiratory complication** | | | | | | | | | | | | | |
| Healthy | 602.73 | | 602.73 | | | 602.73 | | | 1,527.83 | | | 1,760.13 | |
| At risk | 602.73 | | 602.73 | | | 602.73 | | | 1,597.74 | | | 1,863.62 | |
| FLORENCE2 | <5y | 5-17y | | 18-49y | 50-64y | | 65-69y | 70-74y | | 75-79y | 80-84y | | 85+y |
| Bronchitis | 376.47 (all age groups) | | | | | | | | | | | | |
| Pneumonia | 981.66 (all age groups) | | | | | | | | | | | | |
| URTI | 446.60 (all age groups) | | | | | | | | | | | | |
| Cardiac | 2617.08 (all age groups) | | | | | | | | | | | | |
| Renal | 1007.56 (all age groups) | | | | | | | | | | | | |
| CNS | 2164.70 (all age groups) | | | | | | | | | | | | |
| OM | 602.73 (all age groups) | | | | | | | | | | | | |
| Other non-respiratory | 1515.71 (all age groups) | | | | | | | | | | | | |

FLORA2, FLORENCE2 = Analysis 2; FLOU inputs are used for analysis 1 and analysis 2; ° Inputs used as well for FLORA1 and FLORENCE1; NA, Not applicable; URTI, Upper respiratory tract infection, CNS, Cerebral nervous system; OM, Otitis media; m: months old; y: years old.

Table C7. Utility inputs, LYs and QALYs lost due to premature mortality

| **Baseline utilities (healthy and at-risk)** | | | | | | | | | | | | | | | | | | | | | | | | | | | | | | | | |
| --- | --- | --- | --- | --- | --- | --- | --- | --- | --- | --- | --- | --- | --- | --- | --- | --- | --- | --- | --- | --- | --- | --- | --- | --- | --- | --- | --- | --- | --- | --- | --- | --- |
| FLOU° | Paediatric | | | | | | | | | | Adult | | | | | | | | | | | | | | Elderly | | | | | | | |
|  | 0.93 | | | | | | | | | | 0.89 | | | | | | | | | | | | | | 0.74 | | | | | | | |
| FLORA2 | 0-6m | | | | | 7-24m | | | | | | | | 3-17y | | | | | | | 18-64y | | | | | | | | 65+y | | | |
|  | 0.94 | | | | | 0.94 | | | | | | | | 0.93 | | | | | | | 0.89 | | | | | | | | 0.74 | | | |
| FLORENCE2 | <5y | | 5-17y | | | | | 18-49y | | | 50-64y | | | | | 65-69y | | 70-74y | | | | | | | 75-79y | | 80-84y | | | | | 85+y |
|  | 0.94 | | 0.93 | | | | | 0.90 | | | 0.83 | | | | | 0.77 | | 0.77 | | | | | | | 0.70 | | 0.70 | | | | | 0.70 |
| **Influenza disutilities (with and without effective NI treatment)** | | | | | | | | | | | | | | | | | | | | | | | | | | | | | | | | |
| FLOU° | Paediatric | | | | | | | | | | Adult | | | | | | | | | | | | | | Elderly | | | | | | | |
|  | -0.109 | | | | | | | | | | -0.109 | | | | | | | | | | | | | | -0.119 | | | | | | | |
| FLORA2 | 0-6m | | | | | 7-24m | | | | | | | | 3-17y | | | | | | | 18-64y | | | | | | | | 65+y | | | |
|  | -0.109 | | | | | -0.109 | | | | | | | | -0.109 | | | | | | | -0.109 | | | | | | | | -0.119 | | | |
| FLORENCE2 | <5y | | 5-17y | | | | | 18-49y | | | 50-64y | | | | | 65-69y | | 70-74y | | | | | | | 75-79y | | 80-84y | | | | | 85+y |
|  | -0.109 | | -0.109 | | | | | -0.109 | | | -0.109 | | | | | -0.119 | | -0.119 | | | | | | | -0.119 | | -0.119 | | | | | -0.119 |
| **Disutilities associated with hospitalisations due to influenza complications** | | | | | | | | | | | | | | | | | | | | | | | | | | | | | | | | |
| FLOU° | Paediatric | | | | | | | | | | Adult | | | | | | | | | | | | | Elderly | | | | | | | | |
|  | -0.420 | | | | | | | | | | -0.420 | | | | | | | | | | | | | -0.340 | | | | | | | | |
| FLORA2 | 0-6m | | | | 7-24m | | | | | | | | 3-17y | | | | | | | 18-64y | | | | | | | | 65+y | | | | |
|  | -0.420 | | | | -0.420 | | | | | | | | -0.420 | | | | | | | -0.420 | | | | | | | | -0.340 | | | | |
| FLORENCE2 | <5y | | 5-17y | | | | | 18-49y | | | 50-64y | | | | | 65-69y | | 70-74y | | | | | | 75-79y | | 80-84y | | | | | 85+y | |
|  | -0.420 | | -0.420 | | | | | -0.420 | | | -0.420 | | | | | -0.340 | | -0.340 | | | | | | -0.340 | | -0.340 | | | | | -0.340 | |
| **Disutilities associated with outpatient treatment for influenza** | | | | | | | | | | | | | | | | | | | | | | | | | | | | | | | | |
| FLOU° | | Paediatric | | | | | | | | | | Adult | | | | | | | | | | | | | Elderly | | | | | | | |
|  | | NA | | | | | | | | | | NA | | | | | | | | | | | | | NA | | | | | | | |
| FLORA2 | | 0-6m | | | | | 7-24m | | | | | | | | 3-17y | | | | | | | 18-64y | | | | | | | | 65+y | | |
|  | | -0.320 | | | | | -0.320 | | | | | | | | -0.320 | | | | | | | -0.320 | | | | | | | | -0.240 | | |
| FLORENCE2 | | <5y | | 5-17y | | | | | 18-49y | | | 50-64y | | | | | 65-69y | | 70-74y | | | | | | 75-79y | | 80-84y | | | | | 85+y |
|  | | -0.320 | | -0.320 | | | | | -0.320 | | | -0.320 | | | | | -0.240 | | -0.240 | | | | | | -0.240 | | -0.240 | | | | | -0.240 |
| **Discounted lifetime LYs lost with premature mortality** | | | | | | | | | | | | | | | | | | | | | | | | | | | | | | | | |
| FLOU°° | | Paediatric | | | | | | | | | | Adult | | | | | | | | | | | | | Elderly | | | | | | | |
|  | | 19.70 | | | | | | | | | | 16.76 | | | | | | | | | | | | | 8.22 | | | | | | | |
| FLORA2 | | 0-6m | | | | | 7-24m | | | | | | | | 3-17y | | | | | | | | 18-64y | | | | | | | 65+y | | |
| Healthy | | 20.05* | | | | | 20.20* | | | | | | | | 19.81 | | | | | | | | 17.18 | | | | | | | 10.09 | | |
| At-risk | | 16.65* | | | | | 18.10* | | | | | | | | 17.06 | | | | | | | | 12.56 | | | | | | | 6.46 | | |
| **Discounted lifetime QALYs lost with premature mortality** | | | | | | | | | | | | | | | | | | | | | | | | | | | | | | | | |
| FLOU°° | | Paediatric | | | | | | | | Adult | | | | | | | | | | | | | | | Elderly | | | | | | | |
|  | | 17.71 | | | | | | | | 14.41 | | | | | | | | | | | | | | | 6.10 | | | | | | | |
| FLORA2 | | 0-6m | | | | | 7-24m | | | | | | | | 3-17y | | | | | | | | 18-64y | | | | | | | 65+y | | |
| Healthy | | 18.29* | | | | | 18.38* | | | | | | | | 17.75 | | | | | | | | 14.75 | | | | | | | 7.49 | | |
| At-risk | | 15.26* | | | | | 16.55* | | | | | | | | 15.39 | | | | | | | | 10.95 | | | | | | | 4.79 | | |

FLORA2, FLORENCE2 = Analysis 2; FLOU inputs were used for analysis 1 and 2; ° Inputs used for FLORA1 and FLORENCE1 as well; °° Inputs used for FLORA1 as well; *The calculation of the discounted lifetime QALYs was performed based on an age-group of 0 to 1 years old and 1 to 2 years old instead of (0 to 6 months and 7 months to 2 years); m: months old; y: years old.

# Appendix D. Key model input assumptions and sources

## Demographic data

The population size in Brazil in 2014 was estimated at 202,768,562. The age group distribution was calculated using the age-stratified population size and total population size.7 The Brazilian Ministry of Health (MoH) estimated the at-risk population to be around 8,139,623 patients with co-morbidities aged 5 to 59 in 2014.8 The age group distribution of those patients was assumed to follow the reported distribution of influenza vaccines among patients with co-morbidities.9 The at-risk proportions in the age groups <5 and >59 were estimated from US data; for children <5 with asthma10, and for the elderly >59 with specific co-morbidities11. Population all-cause mortality rates were derived from Instituto Brasileiro de Geografia e Estatística (IBGE) for 201412, and were assumed to be 10 times higher for at-risk individuals compared to their healthy counterparts, based on UK data13 due to a lack of Brazilian data. The all-cause mortality of healthy individuals was calculated using the formula: overall mortality for a specific age / (proportion of healthy individuals for that age + 10 x (1- proportion of healthy individuals for that age)). The all-cause mortality for at-risk populations was calculated with the formula: 10 x the all-cause mortality rates for the healthy population. To ensure that (a) the proportion of at-risk persons within the total surviving cohort over time matches with (b) the distributions reported on a population level, a correction factor was applied whereby healthy people move to an at-risk state each year to compensate for the higher loss of at-risk persons due to all-cause mortality. Influenza-related death rates were divided by the hospitalisation rates to obtain the death rates per hospitalisation by age group, based on US data14, and assuming no differences regarding at-risk or otherwise healthy individuals.

The probability of developing symptomatic influenza with no vaccination during one influenza season was derived from US data14, due to a lack of data for Brazil, and assumed higher attack rates for children and senior citizens. In addition, Brazil recognizes other high risk groups; e.g., health workers, pregnant or puerperal women and the indigenous population. Data on the number of health workers, pregnant or puerperal women and the indigenous population were from the SI-PNI (Sistema de Informação do Programa Nacional de Imunizaçõe).15 Because of these additional risk groups, a higher attack rate was applied to the adult population; based on the average attack rate of children 0-4 years and senior citizens (average of 20.30% and 9.00% = 14.65%) and the rate in healthy adults (6.6%), resulting in an average attack rate of 7.05% in adults. The same attack rate was assumed for influenza A and B, with no additional differences with regards to the at-risk or otherwise healthy population.

## Vaccine efficacy (VE) and coverage

VE against influenza A was assumed to be identical for QIV and TIV. VE against influenza A and B was assumed to be unaffected by risk status.16 The average efficacy of TIV against influenza A was estimated from Cochrane reviews in healthy children17, healthy adults16 and elderly people18. The average efficacy of TIV against vaccine matched and mismatched B lineages was estimated from a meta-analysis in adults.19 Inactivated trivalent VE is lower in young children and elderly people than in adults17,20 so the adult estimates were reduced proportionally for these age groups. TIV has some cross-protection against the mismatched/co-circulating second influenza B lineage. Data on VE against influenza B with matching and with mismatch were extracted from Van Bellinghen *et al.* 2014.6 TIV efficacy against influenza B was assumed to be proportional to the percentage match with circulating influenza B.

Base-case estimates of the average match between TIV and the circulating influenza B lineage (59.62%) were calculated from Paiva et al. 201321, Perosa et al. 201522 and WHO FluNet database23, for the period 2002–2014; 2003 and 2006 were excluded because of lacking data, and 2009 because of a pandemic. QIV efficacy was equal to TIV efficacy with optimal matching.24,25 The difference in overall VE between QIV and TIV depended on the proportion of circulating influenza B which varies by year; base-case estimates of the average distribution of influenza cases between influenza A (62.07%) and influenza B (37.93%) were calculated for the period 2002-2014 (excluding 2003, 2006 and 2009) from WHO FluNet database.23 Based on the calculated 59.62% average match between TIV and the circulating influenza B lineage, the VE of QIV against influenza B was estimated to be around 15%-16% higher compared to TIV across all age groups ((QIV VE against influenza B – TIV VE against influenza B) / TIV VE against influenza B).

Vaccine coverage was calculated by dividing the reported number of vaccines distributed by age and at-risk groups (based on data from the MoH), by the Brazilian population stratified by age and at-risk group. The SI-PNI reported 84.37% coverage in children up to 5 years of age15, based on all doses distributed and not considering that some children need two doses for full protection. Thus new estimates were calculated based on the proportion of children (0-1) with full coverage.9,26 For children 2-4 years old, for which only first doses were reported26, the same proportion of fully protected from the 0-1 year olds was applied, assuming the same compliance which may be an overestimation. To be able to calculate the number of vaccines distributed in the model age-groups, the total number of vaccines in the reported age groups was distributed across each year of age, according to the population distribution of these ages.26 No differentiation between healthy and at-risk persons was available for the age-groups <5 and >59 years old. Therefore, the doses distributed in the age-groups 0-1 years, 2 years, 3 years, 4 years and 60-64 years had to be split for healthy and at-risk individuals according to the population stratified by age and at-risk groups. In FLORENCE, the same coverage was assumed for healthy and at-risk individuals of age-groups <5 and >=65 years. In FLORA, the same coverage was assumed for healthy and at-risk individuals of age-groups <3 and >=65 years. Coverage in FLORA was assumed to be zero for age-group 0-6 months according to Brazilian recommendations (vaccination from 6 months of age). Coverage in the age-group 7 months - 2 years was hence equal to the number of fully covered children in age-groups 0-1 and 2 years divided by the population size 7 months to 2 years. In the FLOU model, the same coverage was assumed for healthy and at-risk elderly individuals.

## Resource use

The age- and risk-specific probability of seeking medical advice (MA) due to influenza was based on US data due to a lack of data for Brazil.14 Treatment with neuraminidase inhibitors (NI) is only indicated for at-risk patients in Brazil, with zanamivir recommended when oseltamivir is contra-indicated.27 As zanamivir was not used in 2014, the use of NI (i.e., 70,000 treatments) was estimated from oseltamivir purchases in 2014.27 The at-risk influenza population seeking MA that could have used oseltamivir was calculated as; number of treatments purchased / number of at-risk influenza cases seeking MA = 70,000/619,084 = 11.31%. A number of patients will be resistant to NI treatment, incurring the cost without the benefits of treatment. Averages of reported rates of naturally occurring resistance to oseltamivir were calculated (i.e., 5.03% in children and 1.77% in adults).3 The same resistance rate in adults was assumed for the elderly, due to lack of data.

## Complications and hospitalisation

Mean influenza hospitalisation rates in healthy individuals were derived from Gums *et al.* 200828 for children, and Blumentals et al. 200729 for adults and the elderly in FLOU. In FLORA and FLORENCE, individuals first experience a (respiratory or non-respiratory) complication and are then either hospitalised or treated in an outpatient setting. The probability of influenza complications was derived from Gums *et al.* 200828 for children (pneumonia and OM), and Blumentals *et al.* 200729 for adults (respiratory diagnosis and OM) and the elderly (respiratory diagnosis and OM). The probabilities for at-risk individuals use the healthy population probabilities multiplied by a relative risk ratio calculated from Irwin *et al.* 200130. The probability of influenza complications was reduced in at-risk patients with effective NI treatment, based on the RR with oseltamivir to develop any kind of influenza complication after NI treatment versus no NI treatment.4

The probability of respiratory complications was calculated from Gums *et al.* 200828 for children and Karve *et al.* 201331 for adults and the elderly. The probabilities of respiratory complications in healthy children were calculated by dividing the reported number of patients with pneumonia by the total number of patients with complications (= pneumonia + OM).28 For healthy adults and elderly, the number of patients with respiratory disorders was divided by the total number of patients with complications.31 The probabilities in at-risk individuals were calculated by multiplying the rates in healthy individuals by the RR of complications (1.42) from Irwin *et al.* 200130. Given the limited available data, complications for children were assumed to be pneumonia and OM. For adults and the elderly, non-respiratory (e.g., cardiac, renal, CNS complications, OM and other non-respiratory) complications were from Karve *et al.* 201331 and respiratory complications were supplemented from Blumentals *et al*. 200729. The rates in at-risk individuals were calculated by multiplying the rates in healthy individuals with the RR of complications (1.42) from Irwin *et al.* 200130. The probability of hospitalisation for influenza complications in healthy individuals was calculated based on Gums *et al.* 200828 for children and Blumentals *et al.* 200729 for adults and the elderly. For rates in at-risk individuals, hospitalisation rates in healthy individuals were multiplied by the calculated RR of hospitalisation given influenza complications (RR = 3.04) from Irwin *et al.* 200130.

## Costs

The official list price in Brazil32 was used to obtain the (Price Factory 0%) price of the cheapest TIV vaccines. The mean price per dose of TIV (R$ 25.71), based on the average of 1-dose and 10-doses packs, was compared to 1 dose of QIV (R$ 29.1132), and the premium of QIV over TIV (13.24%) was used in all age groups. Total vaccine administration costs included a GP visit (R$ 10.0033) and vaccine administration costs (R$ 0.6333). In patients aged ≥65 years, no GP visit was included as vaccination was assumed to occur during regular visits for other health reasons. NI treatment costs (R$ 58.21) were estimated from sales of oseltamivir in 2014 and the price reported in the Official Gazette.34 Tappenden *et al.* 20094 reported the proportion of individuals receiving antibiotics due to influenza. The average PMVG price (Preço Máxima de Venda ao Governo = maximum sale prices to the Government) from ANVISA32 of all amoxicillin/clavulanic acid antibiotics was multiplied by the estimated proportion of individuals wrongly prescribed antibiotic treatment. Oral solution was used for children (0-4 years, R$ 11.09), low dose for adolescents (5-17 years, R$ 21.39) and standard dose for adults and elderly (18+ years, R$ 38.87).

Hospitalisation costs were estimated using a top-down approach with data from the DATASUS TabNet database35, which reports the frequency and costs by ICD-10 code. Costs per complication were based on the average cost of the respective ICD-10 sub-groups. For ‘other complications’, the average cost of musculoskeletal complications, the highest reported other complication in Molinari *et al.* 200714, was used.

The cost of hospitalisation by age group in FLOU was a weighted average of the unit costs of hospitalisation multiplied by the probability of different complications, for healthy individuals and at-risk individuals, estimated from Gums *et al.* 200828, Karve *et al.* 201331 and Blumentals *et al.* 200729. The cost of hospitalisation in FLORA were calculated for each age-group by multiplying the hospitalisation cost of each complication by a) the probability that a complication is a (non)-respiratory complication, b) by the probability that a respiratory complication is bronchitis, pneumonia, URTI, or, by the probability that a non-respiratory complication is cardiac, renal, CNS, OM or other non-respiratory complication, and c) by the probability of hospitalisation following each complication. The same outpatient costs were assumed for all complications, assuming at least one follow-up GP visit with the probability of antibiotic treatment (i.e., (GP visit + antibiotic cost)*1.5).

## Utilities

Mean utility values from Gold *et al.* 199836 for the US population were used due a lack of data for Brazil. The same baseline utilities were assumed for healthy and at-risk individuals. The disutility due to influenza for the adult and elderly population was calculated as the weighted average during an influenza episode of the disutility from patients seeking MA or not.37 The same baseline influenza disutility for the adult population was assumed in the paediatric group due to a lack of data. The same daily disutility was applied to influenza with and without NI treatment, however the duration of illness was 7 days in all age groups compared with 5.73 days, without and with effective NI treatment, respectively.38 The daily disutility due to influenza hospitalisation for US patients was used due to a lack of data for Brazil. Disutilities for adults and the elderly were estimated by deducting the disutility for pneumonia (-0.50), a proxy for all hospitalisations regardless the underlying complication in absence of other data, from the reported baseline utilities.38 The hospitalisation disutility in children was assumed to be the same as in adults, due to lack of data. The mean duration of hospitalisation (10 days) was used for all hospitalisations regardless of the underlying complication, due to lack of data.38 The disutility associated with outpatient treatment of an influenza complication was calculated by deducting the general ‘complication utility weight’ (0.6) from the baseline utilities.38 Due to lack of data, the adult disutility associated with outpatient treatment of influenza was assumed in children, and, the same duration for hospitalisation (i.e., 10 days) was assumed for outpatient treatment of influenza complications.

# Appendix E. Analysis 1: Cases, costs and outcomes, TIV and QIV, using FLOU inputs

Table E1. Cases with TIV and QIV vaccination with FLOU data inputs for Brazil

| **CASES (N)** | **FLOU** | | **FLORA** | | **FLORENCE 1-year** | | **FLORENCE lifetime** | |
| --- | --- | --- | --- | --- | --- | --- | --- | --- |
|  | **TIV** | **QIV** | **TIV** | **QIV** | **TIV** | **QIV** | **TIV** | **QIV** |
| Vaccinated | 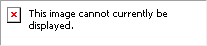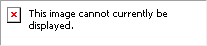42,816,429 | 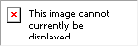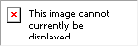42,816,429 | 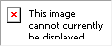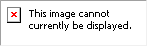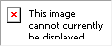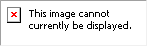42,816,429 | 42,816,429 | 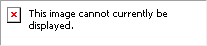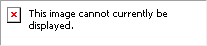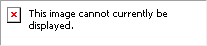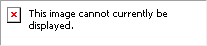42,816,429 | 42,816,429 | 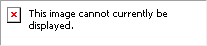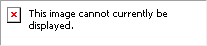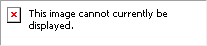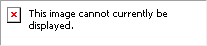2,882,207,563 | 2,883,001,896 |
| Receiving NI PEP | NA | NA | NA | NA | 0 | 0 | 0 | 0 |
| Influenza cases | 15,515,399 | 15,370,230 | 15,515,399 | 15,370,230 | 15,515,399 | 15,370,230 | 668,907,840 | 660,256,955 |
| Seeking first-line MA for uncomplicated influenza | 5,704,527 | 5,630,018 | 5,704,527 | 5,630,018 | 5,704,527 | 5,630,018 | 257,602,421 | 252,586,967 |
| Receiving NI treatment | NA | NA | 0 | 0 | 0 | 0 | 0 | 0 |
| Influenza complications | 178,574 | 173,588 | 178,574 | 173,588 | 178,574 | 173,588 | 11,641,915 | 11,225,436 |
| Hospitalisations | 178,574 | 173,588 | 178,574 | 173,588 | 178,574 | 173,588 | 11,641,915 | 11,225,436 |
| Outpatient treatments | NA | NA | 0 | 0 | 0 | 0 | 0 | 0 |
| Total outpatient visits | 5,704,527 | 5,630,018 | 5,704,527 | 5,630,018 | 5,704,527 | 5,630,018 | 257,602,421 | 252,586,967 |
| Influenza deaths (total) | 21,855 | 20,865 | 21,855 | 20,865 | 21,855 | 20,865 | 2,108,241 | 2,008,371 |
| without prior complications | NA | NA | 0 | 0 | 0 | 0 | 0 | 0 |
| following complication | NA | NA | 21,855 | 20,865 | 21,855 | 20,865 | 2,108,241 | 2,008,371 |

NA = Not applicable; QIV: quadrivalent influenza vaccine; TIV: trivalent influenza vaccine.

Table E2. Costs with TIV and QIV vaccination with FLOU data inputs for Brazil

| **COSTS (R$)** | **FLOU** | | **FLORA** | | **FLORENCE 1-year** | | **FLORENCE lifetime** | |
| --- | --- | --- | --- | --- | --- | --- | --- | --- |
| **TIV** | **QIV** | **TIV** | **QIV** | **TIV** | **QIV** | **TIV** | **QIV** |
| TOTAL COSTS | 1,662,716,582 | 1,802,283,078 | 1,662,716,582 | 1,802,283,078 | 1,662,716,582 | 1,802,283,078 | 29,034,363,321 | 31,512,497,123 |
| Vaccination | 1,431,150,558 | 1,576,833,458 | 1,431,150,558 | 1,576,833,458 | 1,431,150,558 | 1,576,833,458 | 24,949,523,267 | 27,537,895,716 |
| Treatment | 231,566,023 | 225,449,620 | 231,566,023 | 225,449,620 | 231,566,023 | 225,449,620 | 4,084,840,054 | 3,974,601,407 |
| Vaccination | 1,431,150,558 | 1,576,833,458 | 1,431,150,558 | 1,576,833,458 | 1,431,150,558 | 1,576,833,458 | 24,949,523,267 | 27,537,895,716 |
| Vaccine price | 1,100,703,348 | 1,246,386,248 | 1,100,703,348 | 1,246,386,248 | 1,100,703,348 | 1,246,386,248 | 19,531,857,643 | 22,120,074,166 |
| Administration | 330,447,210 | 330,447,210 | 330,447,210 | 330,447,210 | 330,447,210 | 330,447,210 | 5,417,665,624 | 5,417,821,549 |
| NI PEP | NA | NA | NA | NA | 0 | 0 | 0 | 0 |
| Drugs | NA | NA | NA | NA | 0 | 0 | 0 | 0 |
| Medical visits | NA | NA | NA | NA | 0 | 0 | 0 | 0 |
| Uncomplicated influenza treatment | 57,045,267 | 56,300,178 | 57,045,267 | 56,300,178 | 57,045,267 | 56,300,178 | 922,758,805 | 910,184,674 |
| NI treatment | NA | NA | 0 | 0 | 0 | 0 | 0 | 0 |
| Antibiotics | NA | NA | NA | NA | 0 | 0 | 0 | 0 |
| Medical visits | 57,045,267 | 56,300,178 | 57,045,267 | 56,300,178 | 57,045,267 | 56,300,178 | 922,758,805 | 910,184,674 |
| Inpatient complication treatment | 174,520,756 | 169,149,441 | 174,520,756 | 169,149,441 | 174,520,756 | 169,149,441 | 3,162,081,249 | 3,064,416,733 |
| GP visit | NA | NA | 0 | 0 | 0 | 0 | 0 | 0 |
| Hospitalisation | 174,520,756 | 169,149,441 | 174,520,756 | 169,149,441 | 174,520,756 | 169,149,441 | 3,162,081,249 | 3,064,416,733 |
| Outpatient complication treatment | NA | NA | 0 | 0 | 0 | 0 | 0 | 0 |

NA = Not applicable; GP, General practitioner; NI, neuraminidase inhibitor; PEP: post-exposure prophylaxis; QIV: quadrivalent influenza vaccine; TIV: trivalent influenza vaccine.

Table E3. Discounted LYs and QALYs with TIV and QIV vaccination with FLOU data inputs for Brazil

| **HEALTH OUTCOMES** | **FLOU** | | **FLORA** | | **FLORENCE 1-year** | | **FLORENCE lifetime** | |
| --- | --- | --- | --- | --- | --- | --- | --- | --- |
| TIV | **QIV** | **TIV** | **QIV** | **TIV** | **QIV** | **TIV** | **QIV** |
| Life years gained | 202,558,066 | 202,566,647 | 202,558,066 | 202,566,647 | NA | NA | 3,582,746,795 | 3,582,884,469 |
| LYs gained during time horizon | 202,768,562 | 202,768,562 | 202,768,562 | 202,768,562 | NA | NA | NA | NA |
| LYs lost due to mortality | 210,496 | 201,915 | 210,496 | 201,915 | NA | NA | NA | NA |
| QALYs gained | 180,015,466 | 180,022,298 | 180,015,466 | 180,022,298 | NA | NA | 3,157,301,797 | 3,157,411,985 |
| Baseline utilities | 180,213,312 | 180,213,312 | 180,213,312 | 180,213,312 | NA | NA | 3,157,868,763 | 3,157,972,914 |
| QALYs lost due to influenza | 32,482 | 32,172 | 32,482 | 32,172 | 32,482 | 32,172 | 533,570 | 528,424 |
| QALYs lost due to hospitalisation | 1,909 | 1,859 | 1,909 | 1,859 | 1,909 | 1,859 | 33,396 | 32,506 |
| QALYs lost due to outpatient Tx | NA | NA | 0 | 0 | 0 | 0 | 0 | 0 |
| QALYs lost due to mortality | 163,455 | 156,983 | 163,455 | 156,983 | NA | NA | NA | NA |

NA = Not applicable; Tx = treatment; LY: life year; QALY: Quality adjusted life year; QIV: quadrivalent influenza vaccine; TIV: trivalent influenza vaccine

# Appendix F. Analysis 2: Cases, costs and outcomes, TIV and QIV, using best available inputs

Table F1. Cases with TIV and QIV vaccination with best available data inputs for Brazil

| **CASES (N)** | **FLOU** | | **FLORA** | | **FLORENCE 1-year** | | **FLORENCE lifetime** | |
| --- | --- | --- | --- | --- | --- | --- | --- | --- |
|  | **TIV** | **QIV** | **TIV** | **QIV** | **TIV** | **QIV** | **TIV** | **QIV** |
| Vaccinated | 42,816,429 | 42,816,429 | 42,816,429 | 42,816,429 | 42,816,429 | 42,816,429 | 3,555,610,416 | 3,556,735,148 |
| Receiving NI PEP | NA | NA | NA | NA | 0 | 0 | 0 | 0 |
| Influenza cases | 15,515,399 | 15,370,230 | 15,350,356 | 15,196,816 | 15,195,794 | 15,034,495 | 686,811,526 | 676,338,296 |
| Seeking first-line MA for uncomplicated influenza | 5,704,527 | 5,630,018 | 5,608,063 | 5,528,382 | 5,515,808 | 5,431,290 | 277,672,255 | 271,174,027 |
| Receiving NI treatment | NA | NA | 69,140 | 65,218 | 70,000 | 66,143 | 7,425,548 | 7,030,226 |
| Influenza complications | NA | NA | 1,825,086 | 1,801,944 | 1,785,100 | 1,759,763 | 99,026,354 | 97,044,153 |
| Hospitalisations | 178,574 | 173,588 | 173,518 | 168,595 | 171,268 | 166,228 | 16,552,518 | 15,887,779 |
| Outpatient treatments | NA | NA | 1,651,568 | 1,633,349 | 1,613,832 | 1,593,536 | 82,473,836 | 81,156,374 |
| Total outpatient visits | 5,704,527 | 5,630,018 | 7,433,149 | 7,330,326 | 7,300,908 | 7,191,054 | 376,698,610 | 368,218,180 |
| Influenza deaths (total) | 21,855 | 20,865 | 20,959 | 19,997 | 20,920 | 19,956 | 3,430,379 | 3,264,147 |
| without prior complications | NA | NA | NA | NA | 0 | 0 | 0 | 0 |
| following complication | NA | NA | NA | NA | 20,920 | 19,956 | 3,430,379 | 3,264,147 |

NA = Not applicable ; GP: general practitioner; MA: Medical advice; NI: neuraminidase inhibitors; PEP: post-exposure prophylaxis; QIV: quadrivalent influenza vaccine; TIV: trivalent influenza vaccine

Table F2. Costs with TIV and QIV vaccination with best available data inputs for Brazil

| **COSTS (R$)** | **FLOU** | | **FLORA** | | **FLORENCE 1-year** | | **FLORENCE lifetime*** | |
| --- | --- | --- | --- | --- | --- | --- | --- | --- |
| **TIV** | **QIV** | **TIV** | **QIV** | **TIV** | **QIV** | **TIV** | **QIV** |
| TOTAL COSTS | 1,662,716,582 | 1,802,283,078 | 1,763,623,647 | 1,902,162,580 | 1,924,586,285 | 2,060,605,738 | 33,848,881,430 | 36,233,646,436 |
| Vaccination | 1,431,150,558 | 1,576,833,458 | 1,431,150,558 | 1,576,833,458 | 1,431,150,558 | 1,576,833,458 | 24,387,350,792 | 26,969,396,732 |
| Disease management | 231,566,023 | 225,449,620 | 332,473,088 | 325,329,122 | 493,435,727 | 483,772,280 | 9,461,530,638 | 9,264,249,704 |
| Vaccination | 1,431,150,558 | 1,576,833,458 | 1,431,150,558 | 1,576,833,458 | 1,431,150,558 | 1,576,833,458 | 24,387,350,792 | 26,969,396,732 |
| Vaccine price | 1,100,703,348 | 1,246,386,248 | 1,100,703,348 | 1,246,386,248 | 1,100,703,348 | 1,246,386,248 | 19,480,514,427 | 22,062,432,373 |
| Administration | 330,447,210 | 330,447,210 | 330,447,210 | 330,447,210 | 330,447,210 | 330,447,210 | 4,906,836,365 | 4,906,964,358 |
| NI PEP | NA | NA | NA | NA | 0 | 0 | 0 | 0 |
| Drugs | NA | NA | NA | NA | 0 | 0 | 0 | 0 |
| Medical visits | NA | NA | NA | NA | 0 | 0 | 0 | 0 |
| Uncomplicated influenza | 57,045,267 | 56,300,178 | 60,105,561 | 59,080,410 | 223,922,159 | 220,526,810 | 4,067,431,578 | 4,004,168,492 |
| NI treatment | NA | NA | 4,024,930 | 3,796,595 | 4,075,000 | 3,850,467 | 78,180,939 | 73,767,545 |
| Antibiotics | NA | NA | NA | NA | 164,689,079 | 162,363,440 | 3,088,222,978 | 3,042,482,654 |
| Medical visits | 57,045,267 | 56,300,178 | 56,080,630 | 55,283,815 | 55,158,080 | 54,312,903 | 901,027,661 | 887,918,293 |
| Inpatient complications | 174,520,756 | 169,149,441 | 168,670,382 | 163,610,903 | 166,930,767 | 161,781,405 | 3,451,705,285 | 3,337,505,554 |
| GP visit | NA | NA | 1,735,185 | 1,685,952 | 1,712,677 | 1,662,277 | 33,624,600 | 32,561,264 |
| Hospitalisation | 174,520,756 | 169,149,441 | 166,935,197 | 161,924,951 | 165,218,090 | 160,119,128 | 3,418,080,685 | 3,304,944,291 |
| Outpatient complications | NA | NA | 103,697,146 | 102,637,809 | 102,582,801 | 101,464,065 | 1,942,393,775 | 1,922,575,657 |

NA = Not applicable; GP: general practitioner; NI: neuraminidase inhibitors; PEP: post-exposure prophylaxis; QIV: quadrivalent influenza vaccine; TIV: trivalent influenza vaccine

Table F3. Discounted LYs and QALYs with TIV and QIV vaccination with best available data inputs for Brazil

| **HEALTH OUTCOMES** | **FLOU** | | **FLORA** | | **FLORENCE 1-year** | | **FLORENCE lifetime** | |
| --- | --- | --- | --- | --- | --- | --- | --- | --- |
| **TIV** | **QIV** | **TIV** | **QIV** | **TIV** | **QIV** | **TIV** | **QIV** |
| Life years gained | 202,558,066 | 202,566,647 | 202,586,199 | 202,593,551 | NA | NA | 3,646,011,087 | 3,646,169,308 |
| LYs gained during time horizon | 202,768,562 | 202,768,562 | 202,768,562 | 202,768,562 | NA | NA | NA | NA |
| LYs lost due to mortality | 210,496 | 201,915 | 182,363 | 175,011 | NA | NA | NA | NA |
| QALYs gained | 180,015,466 | 180,022,298 | 180,023,066 | 180,029,151 | NA | NA | 3,205,091,791 | 3,205,215,628 |
| Baseline utilities | 180,213,312 | 180,213,312 | 180,213,312 | 180,213,312 | NA | NA | 3,205,895,058 | 3,206,010,465 |
| QALYs lost due to influenza | 32,482 | 32,172 | 32,112 | 31,786 | 31,789 | 31,447 | 527,616 | 522,565 |
| QALYs lost due to hospitalisation | 1,909 | 1,859 | 1,856 | 1,807 | 1,849 | 1,798 | 35,170 | 34,125 |
| QALYs lost due to outpatient Tx | NA | NA | 14,277 | 14,127 | 13,931 | 13,763 | 240,482 | 238,147 |
| QALYs lost due to mortality | 163,455 | 156,983 | 142,001 | 136,442 | NA | NA | NA | NA |

NA = Not applicable; Tx = treatment; LY: life year; QALY: Quality adjusted life year; QIV: quadrivalent influenza vaccine; TIV: trivalent influenza vaccine
